# Supplementary material for: An artificial enzyme cascade amplification strategy for highly sensitive and specific detection of breast cancer-derived exosomes
Source: Royal Society of Chemistry journal article supplement (doi:10.1039/d1an01071a), 2021-01-01
Supplement: d1an01071a1.pdf [file d1an01071a1.pdf]

## SUPPORTING INFORMATION

### **An artificial enzyme cascade amplification strategy for highly sensitive and specific detection of breast cancer-derived exosomes**

Huiying Xu, Lu Zheng, Yu Zhou, and Bang-Ce Ye\*

Lab of Biosystem and Microanalysis, State Key Laboratory of Bioreactor Engineering,  
East China University of Science and Technology, Shanghai, 200237, China

E-mail: beye@ecust.edu.cn

#### **Table of content:**

1. Supporting figures (Fig. S1-5)
2. Supporting table (Table S1-2)

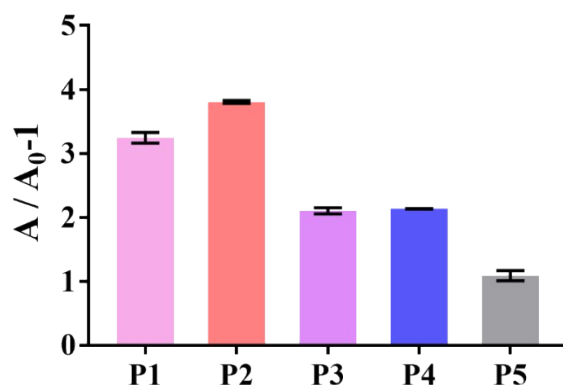

**Fig. S1** Optimization of the G-quadruplex mimicking DNAzyme sequence by comparing the relative signal generated from five common G-quadruplex mimicking DNAzyme sequence. A is the absorbance at 420 nm in the presence of exosomes and A<sub>0</sub> is the absorbance at 420 nm in the absence of exosomes. Error bars show the standard deviation of three experiments.

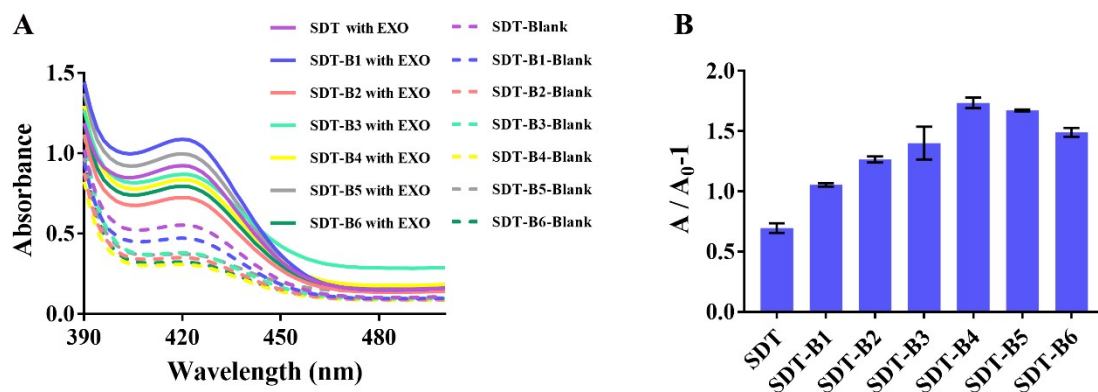

**Fig. S2** Optimization of the switch strands. (A) Absorption spectra of the SDT sensing scaffold coupled with different switch strands (B1, B2, B3, B4, B5, and B6) in the presence and absence of exosomes. (B) The relative signal of the SDT sensing scaffold coupled with different switch strands.

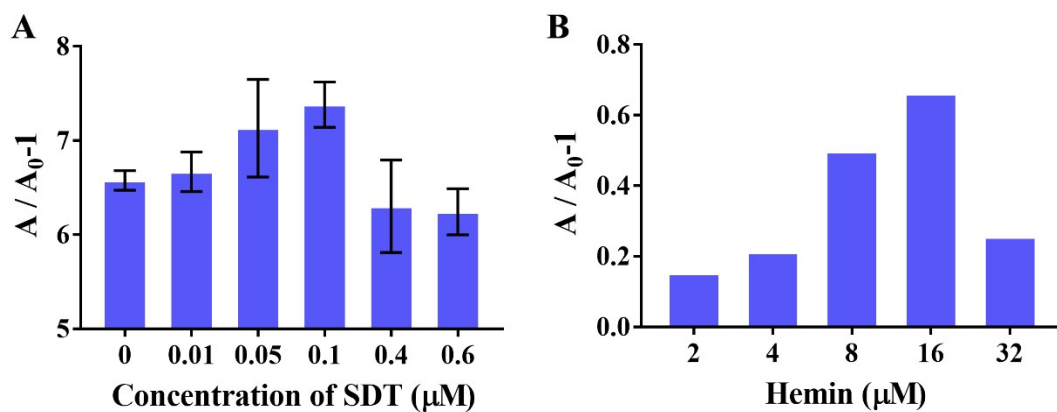

**Fig. S3** (A) The relative signal of different concentration of SDT for detection of MCF-7 exosomes. (B) The relative signal of different concentration of hemin for detection of MCF-7 exosomes.

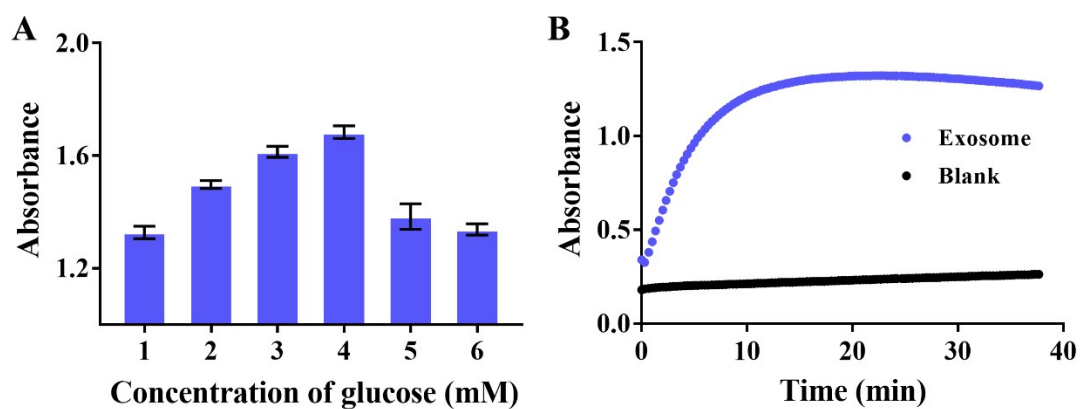

**Fig. S4** (A) The relative signal of the SDT sensing scaffold at 420 nm after incubated with different concentration of glucose. (B) Time-course absorbance monitoring of the SDT sensing scaffold after adding all the reagents in the presence and absence exosomes.

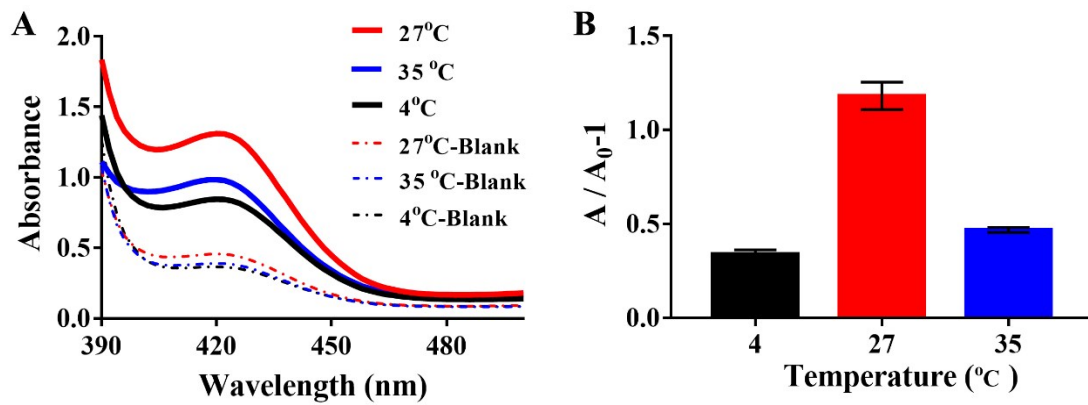

**Fig. S5** Influence of temperature (4, 27, and 35°C) on the formation of G-quadruplex. (C) Histogram of absorbance change ratio ( $A/A_0-1$ ) for the different reaction temperature.

## 2 Supporting Tables

**Table S1.** Sequence of oligonucleotides designed in this study<sup>a</sup>

| DNA | Sequence (from 5' to 3')                                                                        |
|-----|-------------------------------------------------------------------------------------------------|
| P1  | GGG TTG GGC GGG ATG GGG <b>GTA TCCA</b>                                                         |
| P2  | TTT GGG TAG GGC GGG TTG GGG <b>GTA TCC A</b>                                                    |
| P3  | GGG TAG GGC GGG TTG GGG <b>GTA TCC A</b>                                                        |
| P4  | CTG GGA GGG AGG GAG GGA <b>GGT ATC CA</b>                                                       |
| P5  | ACC TGG GGG AGT ATT GCG <b>GTA TCC A</b>                                                        |
| A76 | <b>TCAACTTTGGGTAGGGCGGGTTGGGGGTATCCATGATAAAACGACACTACGT</b><br><b>GGGAA</b> TCTACTATGGCGGCTCTTC |
| B76 | <b>TTCAGTTTGGGTAGGGCGGGTTGGGGGTATCCAAATGTGCTTCCACGTAGT</b><br><b>GTCGTTTGTATTGGACCCTCGCAT</b>   |
| C59 | <b>CTGAA</b> TTTTTT <b>ATTACAGCTTGCTACACTTTTTGAAGAGCCGCCATAGTATTTTTA</b><br><b>CATT</b>         |
| D59 | <b>GTTGA</b> TTTTTT <b>GTGTAGCAAGCTGTAATTTTTATGCGAGGGTCCAATACTTTTTT</b><br><b>ATCA</b>          |
| B1  | <u>TTGATCCTTTGGATACC</u> CCC AAC                                                                |
| B2  | <u>TTGATCCTTTGGATACC</u> CCC AAC CCG                                                            |
| B3  | <u>TTGATCCTTTGGATACC</u> CCC AAC CCG CCC                                                        |
| B4  | <u>TTGATCCTTTGGATACC</u> CCC AAC CCG CCC TAC                                                    |
| B5  | <u>TTGATCCTTTGGATACC</u> CCC AAC CCG CCC TAC CCA                                                |
| B6  | <u>TTGATCCTTTGGATACC</u> CCC AAC CCG CCC TAC CCA AA                                             |

<sup>a</sup> Bold bases are the G-quadruplex sequence, and underlined bases are MUC1 aptamer.

**Table S2.** Comparison of our method and reported methods for exosomes detection.

| Platform                                                       | Linear range (particles/mL)             | LOD (particles/mL) | Method          | Assay time | Reference |
|----------------------------------------------------------------|-----------------------------------------|--------------------|-----------------|------------|-----------|
| B-Chol anchor assay with enzyme-linked HCR                     | $2.3 \times 10^6 - 2.3 \times 10^8$     | $2.2 \times 10^6$  | Colorimetric    | ~16.5 h    | 1         |
| large-AR AuNBP@MnO <sub>2</sub> NSs                            | $8.5 \times 10^5 - 8.5 \times 10^7$     | $1.35 \times 10^5$ | Colorimetric    | ~2.5 h     | 2         |
| Aptamer-based DNA nanodevices                                  | $10^6 - 10^{11}$                        | $10^6$             | Fluorescence    | -          | 3         |
| “on-off”-type aptasensor                                       | $1.0 \times 10^8 - 1.6 \times 10^9$     | $4.2 \times 10^7$  | Fluorescence    | 32 min     | 4         |
| Aptasensor based on g-C <sub>3</sub> N <sub>4</sub> nanosheets | $1.9 \times 10^9 - 3.38 \times 10^{10}$ | $1.35 \times 10^9$ | Colorimetric    | ~30 min    | 5         |
| HRP-pSC <sub>4</sub> -AuNPs@COFs                               | $5 \times 10^5 - 1.5 \times 10^{10}$    | $1.6 \times 10^5$  | electrochemical | ~3 h       | 6         |
| Switchable DNA tetrahedral scaffolds                           | $3.8 \times 10^6 - 1.2 \times 10^8$     | $1.51 \times 10^5$ | Colorimetric    | ~2 h       | This work |

**REFERENCES**

- 1 F. He, H. Liu, X. Guo, B.-C. Yin and B.-C. Ye, *Anal. Chem.*, 2017, **89**, 12968-12975.
- 2 Y. Zhang, J. Jiao, Y. Wei, D. Wang, C. Yang and Z. Xu, *Anal. Chem.*, 2020, **92**, 15244-15252.
- 3 D. He, S.-L. Ho, H.-N. Chan, H. Wang, L. Hai, X. He, K. Wang and H.-W. Li, *Anal. Chem.*, 2019, **91**, 2768-2775.
- 4 J. Zhang, J. Shi, W. Liu, K. Zhang, H. Zhao, H. Zhang and Z. Zhang, *Sens. Actuators B Chem.*, 2018, **276**, 552-559.
- 5 Y.-M. Wang, J.-W. Liu, G. B. Adkins, W. Shen, M. P. Trinh, L.-Y. Duan, J.-H. Jiang and W. Zhong, *Anal. Chem.*, 2017, **89**, 12327-12333.
- 6 M. Wang, Y. Pan, S. Wu, Z. Sun, L. Wang, J. Yang, Y. Yin and G. Li, *Biosens. Bioelectron.*, 2020, **169**, 112638.
